# Supplementary material for: Generalized Synthesis of EAs [E = Fe, Co, Mn, Cr] Nanostructures and Investigating Their Morphology Evolution
Source: Hindawi journal article supplement (doi:10.1155/2015/362152), 2015-01-01
Supplement: f1 [file 362152.f1.pdf]

# Generalized Synthesis of *EAs* [*E* = Fe, Co, Mn, Cr] Nanostructures and Investigating their Morphology Evolution

P. Desai<sup>1</sup>, N. Ashokaan<sup>2</sup>, M. Nath<sup>1,\*</sup>

## Supplementary Information

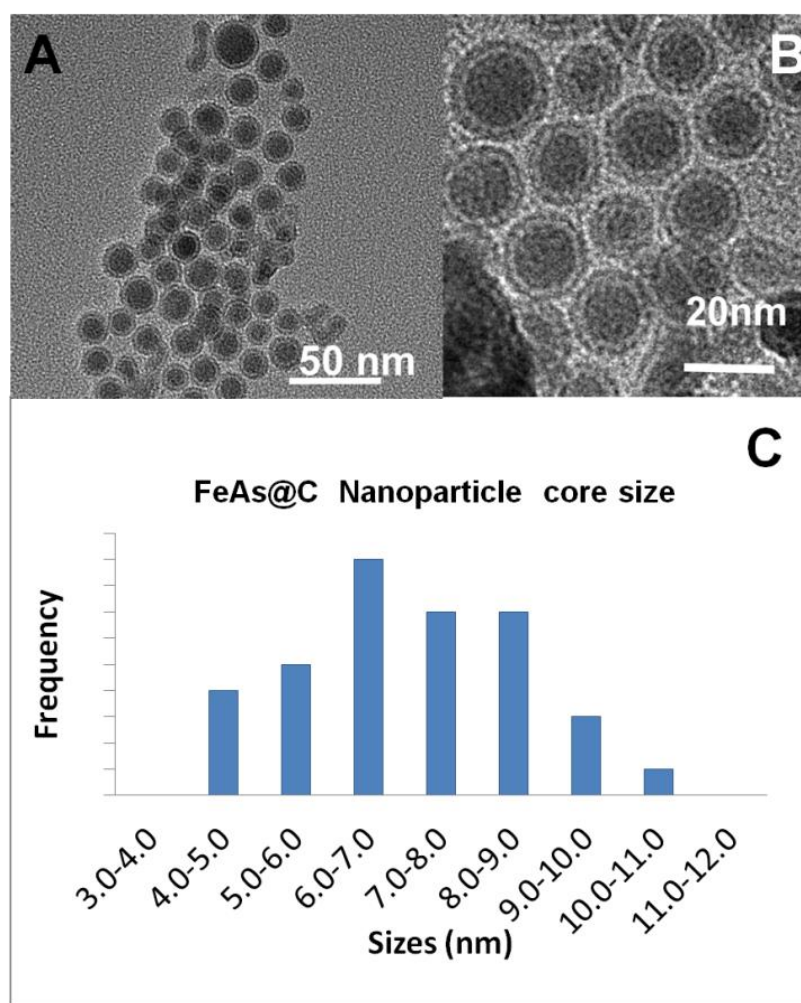

**Figure S1.** STEM images of the FeAs nanoparticles and histogram analysis for the size distribution of the core in these nanoparticles.

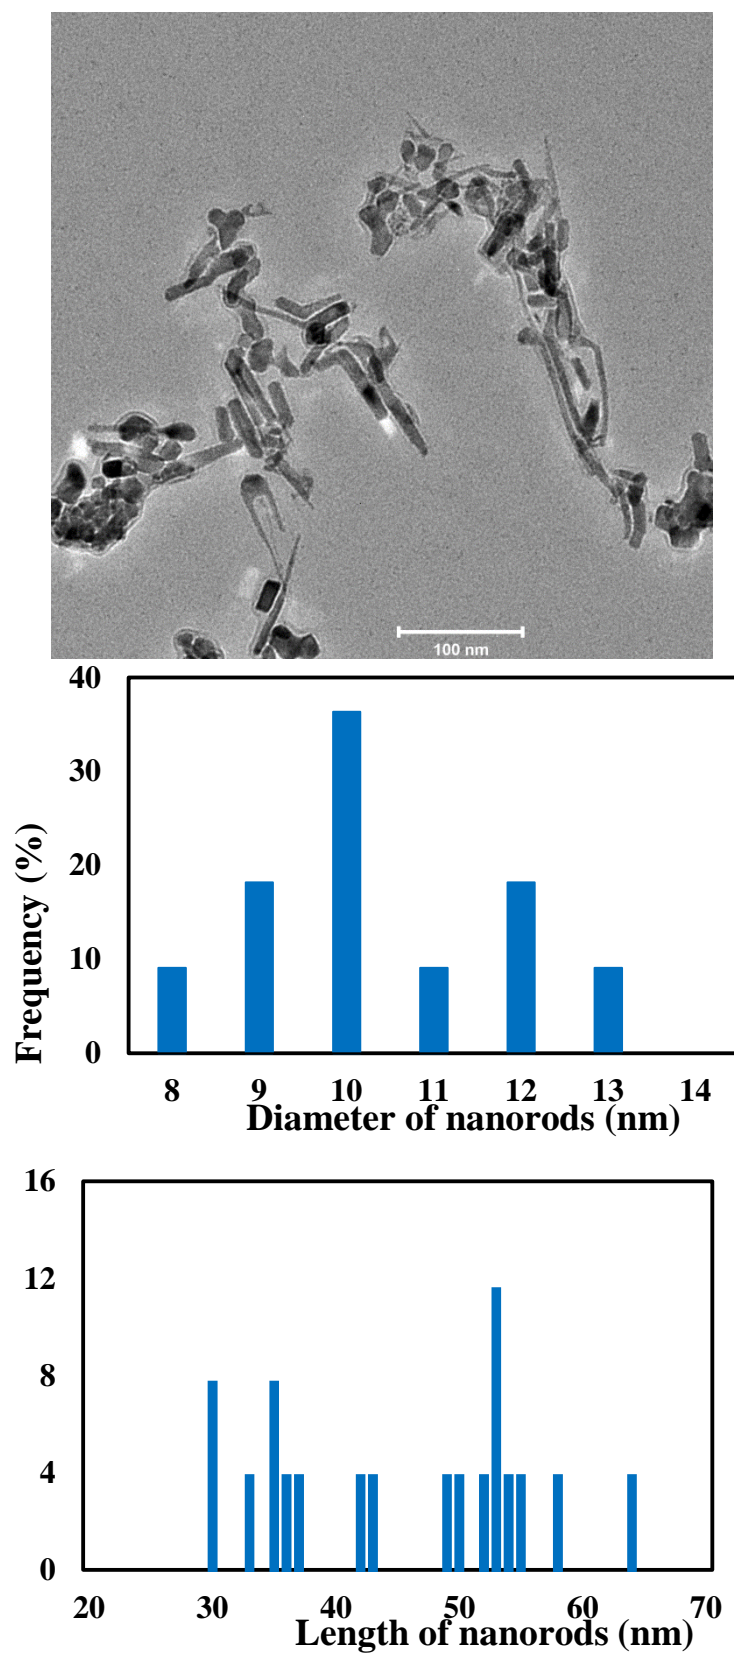

**Figure S2.** STEM images of the FeAs nanoparticles and histogram analysis for the size distribution of the core in these nanoparticles.
